# Supplementary material for: Grafting {Cp*Rh}2+ on the surface of Nb and Ta Lindqvist-type POM
Source: Royal Society of Chemistry journal article supplement (doi:10.1039/c4dt03339f), 2014-12-01
Supplement: c4dt03339f1.pdf [file c4dt03339f1.pdf]

## Grafting $\{\text{Cp}^*\text{Rh}\}^{2+}$ on the surface of Nb and Ta Lindqvist-type POM

P.A. Abramov<sup>1,2</sup>, M.N. Sokolov<sup>1,2</sup>, A.V. Virovets,<sup>1</sup> S. Floquet<sup>3</sup>, M. Haouas<sup>3</sup>,  
F. Taulelle<sup>3</sup>, E. Cadot<sup>3</sup>, C. Vicent<sup>4</sup>, V.P. Fedin<sup>1,2</sup>

<sup>1</sup> Nikolaev Institute of Inorganic chemistry SB RAS, Novosibirsk, Russia 630090

<sup>2</sup> Novosibirsk State University, Novosibirsk, Russia 630090

<sup>3</sup> Institut Lavoisier de Versailles, UMR 8180, University of Versailles Saint-Quentin en Yvelines, 45  
Avenue des Etats-Unis, 78035 Versailles, France

<sup>4</sup> Serveis Centrals d'Instrumentació Científica, Universitat Jaume I, Av. Sos Baynat s/n, 12071  
Castelló, Spain

***Supporting information***

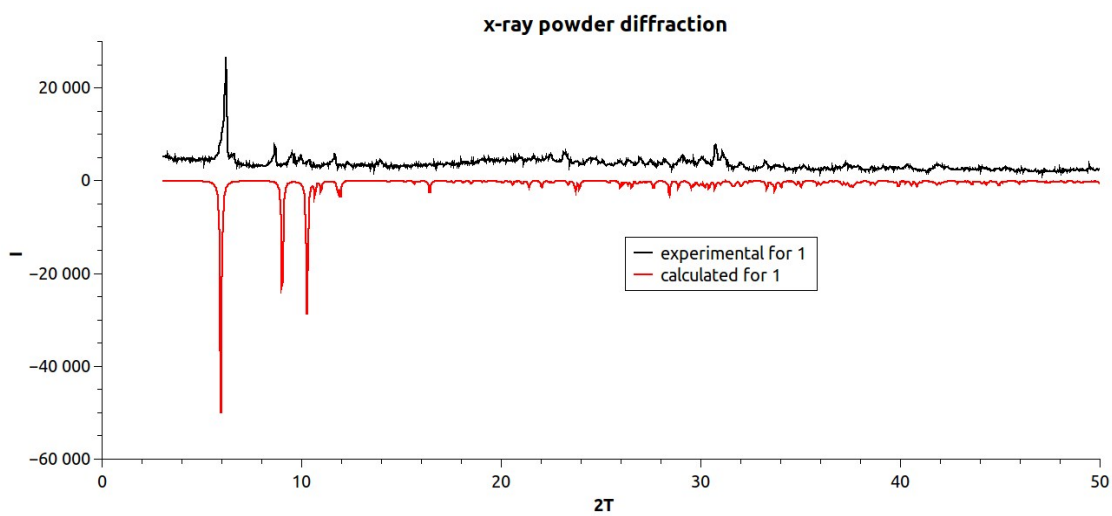

**Fig. S1.** X-ray powder pattern for complex 1.

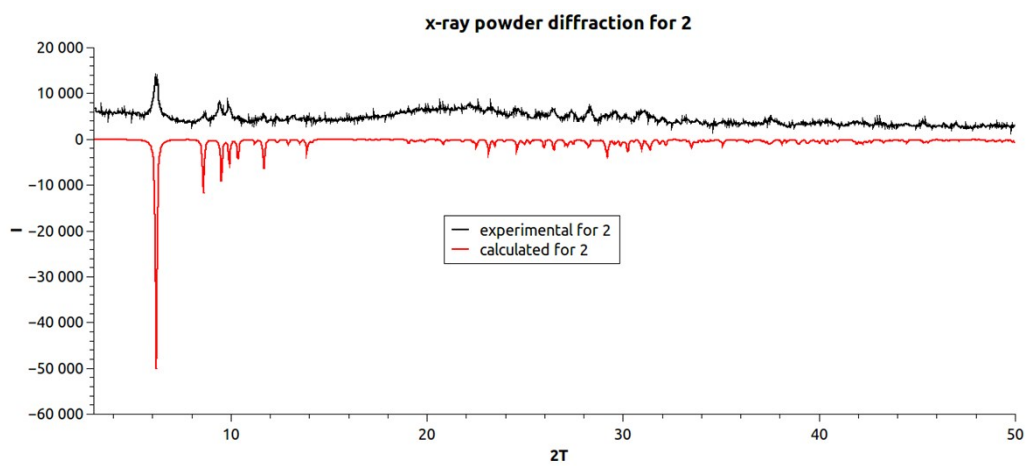

**Fig. S2.** X-ray powder pattern for complex 2.

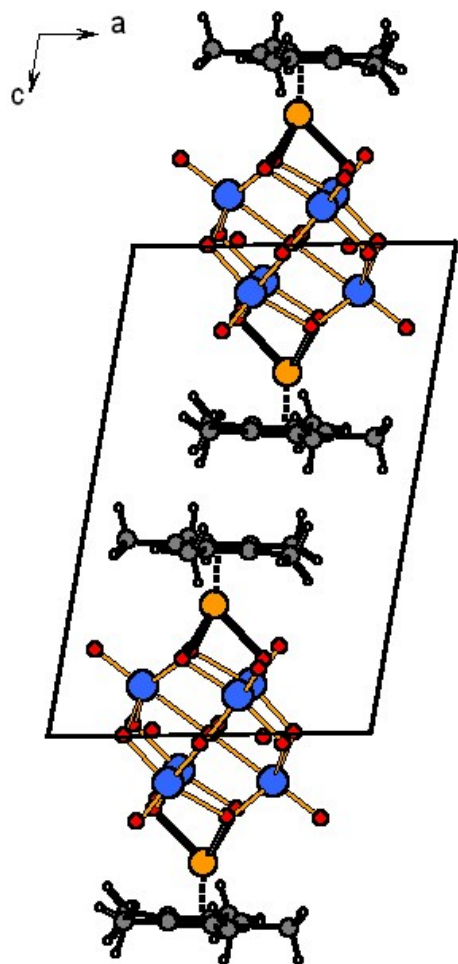

**Fig. S3.** Part of the layered crystal packing of **2**, formation of  $\pi$ - $\pi$  interactions between layers. Tantalum is blue, Rh is orange, C is grey.

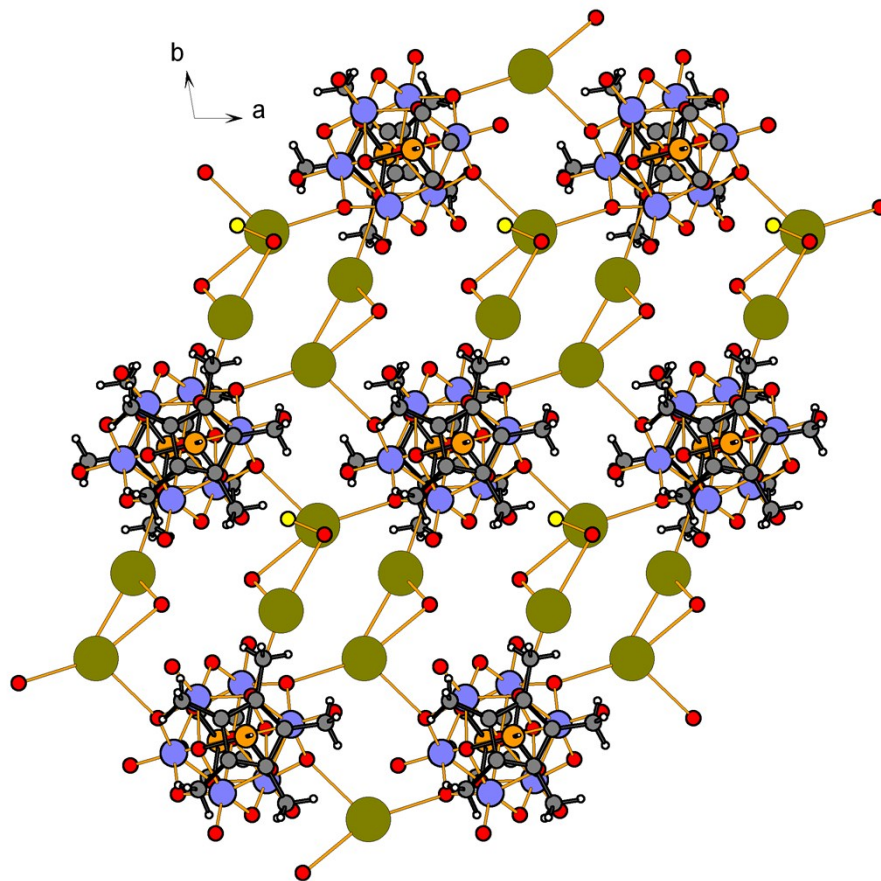

**Fig. S4.** Dimers of Cs<sup>+</sup> (green-brown) cations inside the layer in the crystal packing of **2**. Tantalum is blue, rhodium is orange. Disordered positions of the water molecules are shown as red and yellow.

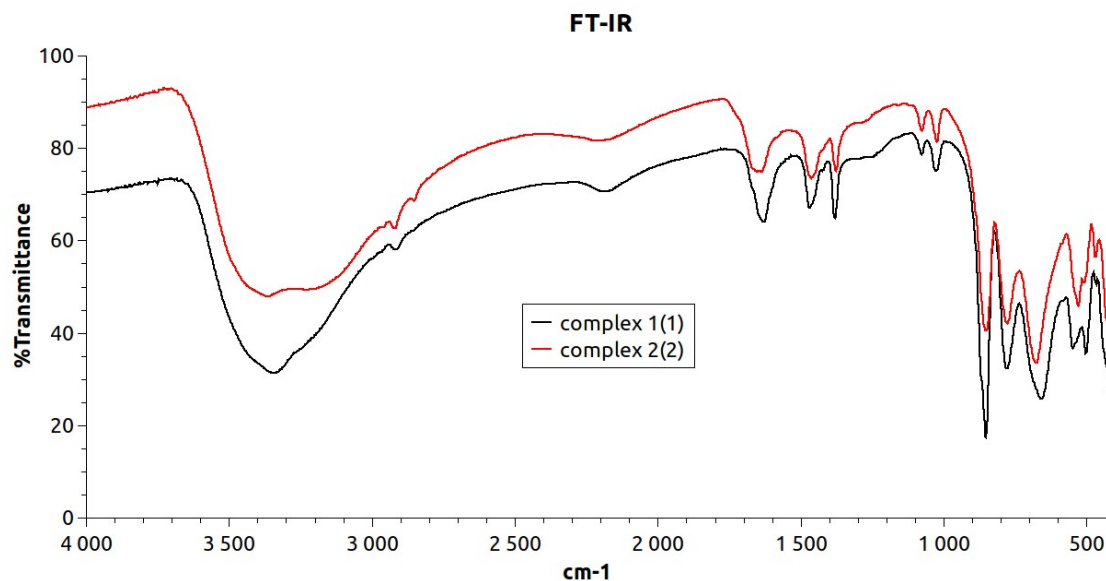

**Figure S5.** FT-IR spectra of 1 and 2.

The FT-IR spectra of 1 and 2 show characteristic vibration bands resulting from the Lindqvist hexaniobate structure, namely, the peak at  $861\text{ cm}^{-1}$  attributed to terminal Nb–O<sub>t</sub> characteristic vibration, as well as peaks at 772, 686, 532, and  $437\text{ cm}^{-1}$  assigned to bridging Nb–O<sub>b</sub>–Nb vibration [1]. IR bands from {Cp\*Rh} fragments are 2952, 2875, 1465, 1374, 1150,  $1063\text{ cm}^{-1}$ .

[1] A.V. Besserguenev, M.H. Dickman, M.T. Pope, *Inorg. Chem.* 2001, 40, 2582.

**Table S1.** Experimental details

|                                                                            | <b>1</b>                                                                                      | <b>2</b>                                                                                      |
|----------------------------------------------------------------------------|-----------------------------------------------------------------------------------------------|-----------------------------------------------------------------------------------------------|
| Chemical formula                                                           | $C_{20}H_{70}K_4Nb_6O_{39}Rh_2$                                                               | $C_{20}H_{66}Cs_4O_{37}Rh_2Ta_6$                                                              |
| $M_r$                                                                      | 1854.44                                                                                       | 2721.89                                                                                       |
| Crystal system, space group                                                | Monoclinic, $P2_1/c$                                                                          | Triclinic, $P\bar{1}$                                                                         |
| Temperature (K)                                                            | 150                                                                                           | 150                                                                                           |
| $a, b, c$ (Å)                                                              | 14.8711 (17), 9.5972 (11),<br>19.615 (2)                                                      | 9.5851 (10), 10.5155 (11), 14.6458 (15)                                                       |
| $\alpha, \beta, \gamma$ (°)                                                | 90, 91.761 (3), 90                                                                            | 95.814 (3), 99.365 (3), 98.708 (3)                                                            |
| $V$ (Å <sup>3</sup> )                                                      | 2798.1 (5)                                                                                    | 1427.7 (3)                                                                                    |
| $Z$                                                                        | 2                                                                                             | 1                                                                                             |
| $F(000)$                                                                   | 1828                                                                                          | 1230                                                                                          |
| Radiation type                                                             | Mo $K\alpha$                                                                                  | Mo $K\alpha$                                                                                  |
| $\mu$ (mm <sup>-1</sup> )                                                  | 2.15                                                                                          | 14.61                                                                                         |
| Crystal size (mm)                                                          | 0.28 × 0.06 × 0.04                                                                            | 0.08 × 0.07 × 0.07                                                                            |
| Diffractometer                                                             | Bruker Apex2 Duo                                                                              | Bruker Apex2 Duo                                                                              |
| Absorption correction                                                      | Empirical (using intensity measurements) based on intensities ( <i>SADABS</i> , Bruker, 2005) | Empirical (using intensity measurements) based on intensities ( <i>SADABS</i> , Bruker, 2005) |
| $T_{\min}, T_{\max}$                                                       | 0.603, 0.746                                                                                  | 0.596, 0.746                                                                                  |
| No. of measured, independent and observed [ $I > 2\sigma(I)$ ] reflections | 19444, 8599, 6081                                                                             | 8488, 6435, 4679                                                                              |
| $R_{\text{int}}$                                                           | 0.062                                                                                         | 0.036                                                                                         |
| $\theta$ values (°)                                                        | $\theta_{\max} = 30.7, \theta_{\min} = 2.1$                                                   | $\theta_{\max} = 27.5, \theta_{\min} = 2.2$                                                   |
| Range of $h, k, l$                                                         | $-21 \leq h \leq 11, -13 \leq k \leq 13,$<br>$l = -26 \leq l \leq 28$                         | $-12 \leq h \leq 11, -13 \leq k \leq 10,$<br>$-18 \leq l \leq 19$                             |

|                                                             |                                                                                   |                                                                        |
|-------------------------------------------------------------|-----------------------------------------------------------------------------------|------------------------------------------------------------------------|
| $R[F^2 > 2\sigma(F^2)], wR(F^2), S$                         | 0.066, 0.143, 1.10                                                                | 0.048, 0.106, 1.03                                                     |
| No. of reflections, parameters, restraints                  | 8599, 327, 6                                                                      | 6435, 327, 108                                                         |
| Weighting scheme                                            | $w = 1/[\sigma^2(F_o^2) + (0.0218P)^2 + 45.4204P]$ where $P = (F_o^2 + 2F_c^2)/3$ | $w = 1/[\sigma^2(F_o^2) + (0.0387P)^2]$ where $P = (F_o^2 + 2F_c^2)/3$ |
| $\Delta\rho_{\max}, \Delta\rho_{\min}$ (e Å <sup>-3</sup> ) | 1.94, -1.70                                                                       | 2.10, -3.68                                                            |

Computer programs: Apex2 V.1.27 (Bruker, 2005), *SHELXS97* (Sheldrick, 1990), *SHELXL97* (Sheldrick, 1997), *SHELXTL* V6.22 (Bruker, 2000-2005), local programs.
